1 *Plasmodium falciparum* hydroxymethylbilane synthase does not house any cosynthase activity within the  
2 haem biosynthetic pathway

3 **Alan F. Scott<sup>1,2</sup>, Evelyne Deery<sup>1</sup>, Andrew D. Lawrence<sup>1</sup>, Martin J. Warren<sup>1,3</sup>**

4

5 <sup>1</sup>School of Biosciences, University of Kent, Canterbury, Kent, CT2 7NJ, United Kingdom

6 <sup>2</sup>Current address: School of Biochemistry, University of Bristol, Bristol, BS8 1TD, United Kingdom

7 <sup>3</sup>Quadram Institute Bioscience, Norwich Research Park, Norwich, NR4 7UQ, United Kingdom

8 To whom correspondence should be addressed: Alan Scott, School of Biochemistry, University of Bristol,  
9 Bristol, BS8 1TD, United Kingdom, E-mail: alan.scott@bristol.ac.uk

10

11 **Keywords:** *Plasmodium falciparum*; haem synthesis; uroporphyrinogen III; hydroxymethylbilane;

12 porphobilinogen deaminase

13 **Abstract**

14 The production of uroporphyrinogen III, the universal progenitor of macrocyclic, modified tetrapyrroles,  
15 is produced from aminolaevulinic acid (ALA) by a conserved pathway involving three enzymes:  
16 porphobilinogen synthase (PBGs), hydroxymethylbilane synthase (HmbS) and uroporphyrinogen III  
17 synthase (UroS). The gene encoding uroporphyrinogen III synthase has not yet been identified in  
18 *Plasmodium falciparum* but it has been suggested that this activity is housed inside a bifunctional  
19 hydroxymethylbilane synthase (HmbS). In this present study it is demonstrated that *P. falciparum* HmbS  
20 does not have uroporphyrinogen III synthase activity. This was demonstrated by the failure of a codon  
21 optimised *P. falciparum hemC* gene, encoding HmbS, to complement a defined *E. coli hemD* mutant  
22 (SASZ31) deficient in uroporphyrinogen III synthase activity. Furthermore, HPLC analysis of the oxidised  
23 reaction product from recombinant, purified HmbS showed that only uroporphyrin I could be detected  
24 (corresponding to hydroxymethylbilane production). No uroporphyrin III was detected, thus showing that  
25 *P. falciparum* HmbS does not have UroS activity and can only catalyse the formation of  
26 hydroxymethylbilane from porphobilinogen.

27 **Introduction:**

28 Haem, as an iron-containing porphyrin, is a modified tetrapyrrole that is derived from the starting material  
29 5-aminolevulinic acid (5-ALA) [1]. The construction of the macrocyclic framework of haem is mediated  
30 in just three steps [1]. Firstly, two molecules of 5-ALA are condensed to give a pyrrole, porphobilinogen  
31 (PBG), in a reaction catalysed by PBG synthase [2, 3]. The next step involves the polymerisation of four  
32 pyrrole units (termed A-D) into a linear bilane called hydroxymethylbilane (HMB) and is mediated by an  
33 enzyme called HMB synthase (HmbS) that deaminates and links together four molecules of PBG [4–7].  
34 Finally, the bilane undergoes cyclisation, but only after inversion of the terminal D ring, to give  
35 uroporphyrinogen III [6, 7]. These three steps are found in all organisms that make modified tetrapyrroles  
36 [1]. These reactions are shown in Figure 1.

37

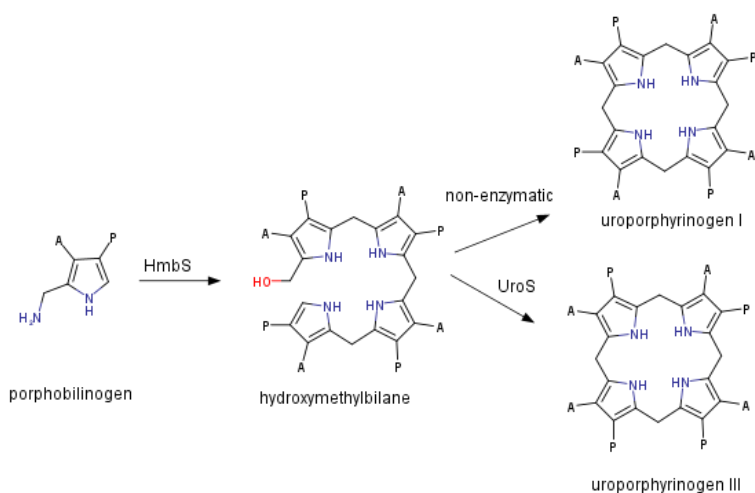

38

39 **FIGURE 1 – Reactions of HmbS and UroS**

40 HmbS polymerises porphobilinogen into hydroxymethylbilane which auto-cyclises to uroporphyrinogen  
41 I. If UroS is present then hydroxymethylbilane is cyclised into uroporphyrinogen III, a reaction that  
42 involves the inversion of ring D. A = Acetic Acid, P = propionic acid.

43

44 A pathway for haem biosynthesis is found in *Plasmodium falciparum*, the protozoan parasite and  
45 causative agent of malaria [8]. As a haematophagous organism (blood-feeding parasite) it exists for part

46 of its life cycle in a haem-rich environment and releases large quantities of haem as an insoluble  
47 crystalline material called haemozoin [9]. Nonetheless, for survival outside of the red blood cell it  
48 requires a functional haem synthesis pathway that is essential in the liver and parasite growth stages [10,  
49 11]. Recent studies have biochemically characterised the complete set of haem synthesis enzymes from *P.*  
50 *falciparum* with the notable exception of uroporphyrinogen III synthase (UroS, formerly HemD) [12–18].  
51 This enzyme is sometimes called uroporphyrinogen III cosynthase as it often co-purifies with  
52 hydroxymethylbilane synthase (HmbS, formerly porphobilinogen deaminase or HemC) and both of these  
53 enzymes are required to make uroporphyrinogen III from PBG [5, 19]. HmbS catalyses the synthesis of  
54 an unstable linear tetrapyrrole, HMB [4, 6, 7]. This rapidly cyclises into uroporphyrinogen I unless the  
55 cosynthase is present to invert the terminal ring and cyclise HMB into uroporphyrinogen III [6, 7, 20].  
56 This is the only isomer that can proceed through the haem synthesis pathway. A candidate gene encoding  
57 UroS in *P. falciparum* has been identified by bioinformatics but there have been no biochemical studies to  
58 validate the finding [21]. Another report in the literature has suggested that the parasite does not need a  
59 separate cosynthase because UroS activity can be found within a bi-functional HmbS that houses both  
60 HMB synthase and uroporphyrinogen III cosynthase activities [18]. The evidence presented for this was  
61 HPLC identification of the (oxidised) reaction product as uroporphyrin III from both native and  
62 recombinant HmbS when incubated with PBG.

63 Although such dual activity has previously been reported for HmbS from *L. interrogans*, this is a very  
64 different protein from *P. falciparum* HmbS, being a fusion of HmbS and UroS enzymes [22]. Conversely,  
65 the *P. falciparum* HmbS is clearly not a fusion protein because it has similarity to other HmbS enzymes  
66 throughout its entire sequence length (with the exception of the N-terminal apicoplast localisation  
67 sequence but dual activity was claimed for a truncated HmbS without this signal sequence) [18]. There  
68 are also some short inserts in the *P. falciparum* sequence, but it is unlikely that UroS activity is contained  
69 within these inserts because they are not very long – the longest is 31 amino acids. A multiple sequence  
70 alignment is shown in Figure S1. It is, therefore, hard to understand how this enzyme could house two

71 very different activities. Consequently, this report investigates more closely the evidence for dual activity  
72 using genetic complementation studies and analytical chemistry.

### 73 **Experimental Procedures**

74 *Gene Cloning:* A synthetic, codon-adapted *hemC* gene, encoding *P. falciparum* HmbS, was purchased  
75 from GeneArt for optimal expression in *Escherishia coli* (Figure S2) and subcloned into a *pET-3a* vector  
76 (Novagen) using *NdeI* and *SpeI* restriction sites (the *pET-3a* had been modified to include an *SpeI* site 5'  
77 of the *BamHI* site). Two further constructs were made containing a truncated version of the *hemC* gene to  
78 remove a potential signal sequence from the protein product [18]. The truncated gene was obtained by  
79 PCR using the following primers:

80 5' primer containing *NdeI* site and start codon:

81 CACCATATGGGCATCAAAGATGAAATTATTATCGG

82 3' primer containing *SpeI* site and stop codon:

83 CTCACTAGTTATTTATTGTTTCAGCAGG

84 The PCR product was ligated into a *pET-3a* and *pET-14b* (Novagen) use *NdeI* and *SpeI* restriction sites  
85 (both vectors had been previously modified to include an *SpeI* site 5' of the *BamHI* site).

86 The constructs were sequenced by GATC Biotech to check for the correct insert, reading frame and  
87 absence of mutations.

88 *Complementation Studies:* A defined *hemD*<sup>-</sup> mutant SASZ31(CGSC#: 7153 Coli Genetic Stock Center,  
89 Yale University) [23] was transformed with the following plasmids:

90 pET-3a                      Empty vector

91 pET-14b                     Empty vector

92 pET-3a *hemC*                *P. falciparum hemC*

93 pET-3a *hemC*<sup>truncated</sup>      *P. falciparum hemC*<sup>truncated</sup>

94 pET-14b *hemD*              *B. megaterium hemD* [24]

95 pET-14b *hemD*              *E. coli hemD* (a kind gift from Prof. Peter Shoolingin-Jordan, Southampton)

96 The transformations were plated onto LB-Agar plates with 100 µg/ml ampicillin and 2 % glucose and  
97 incubated at 37 °C for 24 hours. They were examined for growth and left for an additional 24 hours after  
98 which the colonies were re-streaked onto fresh plates. After incubation at 37 °C for 24 hours the plates  
99 were examined for growth.

100 *Protein Overproduction and Purification:* BL21<sup>STAR</sup> (DE3) pLysS (Invitrogen) were transformed with the  
101 *pET-14b hemC<sup>truncated</sup>* construct and a 1 litre culture of the resulting strain was grown in LB at 37 °C with  
102 shaking to an OD<sub>600</sub> of 0.6. Gene expression was induced for 20 hours at 19 °C by adding 0.4 mM IPTG.  
103 Cells were harvested by centrifugation at 4 000 rpm for 15 minutes at 4° C. The pellet was re-suspended  
104 in 15 ml re-suspension buffer containing 20mM Tris HCl pH 8.0, 500 mM NaCl, 5 mM imidazole.  
105 Cells were lysed on an ice-water slurry by sonication at 60% amplitude for 3 minutes at 30 second  
106 intervals. The lysate was spun for 15 minutes at 19 000 rpm and the supernatant loaded onto a Ni<sup>2+</sup>-  
107 Sepharose column (GE Healthcare) pre-equilibrated with re-suspension buffer. The column was washed  
108 with re-suspension buffer containing 50 mM imidazole and eluted with re-suspension buffer containing  
109 400 mM imidazole. The protein was buffer exchanged with a PD-10 column (GE Healthcare) into 50 mM  
110 Tris HCl pH 8.0, 100 mM NaCl.

111 *Identification of the Reaction Product:* Purified recombinant HmbS was heated to 60 °C for 10 minutes  
112 on a heat block prior to the assay to deactivate any contaminating UroS. HmbS (25 µg) was incubated  
113 with 200 µM porphobilinogen at 37 °C in 0.1 M Tris HCl pH 8.0. After 1 hour, the reaction was stopped  
114 by diluting 10x into 1 M HCl. The reaction product was oxidised by adding 10 µl of a 1 mg/ml  
115 benzoquinone in methanol and incubating for 60 minutes. The mixture was run on an HPLC to identify  
116 which uroporphyrin isomer was present. Commercial standards of uroporphyrin I and III (Frontier  
117 Scientific) were also run to aid identification.

118 The uroporphyrin I and III isomers were separated on an ACE 5 AQ column, dimensions 250 mm x  
119 4.6 mm, using an Agilent 1100 HPLC system with a flow rate of 1.0 ml/min. The mobile phase was 1 M  
120 ammonium acetate pH 5.16 and the organic phase was acetonitrile. A 100 µl sample was injected onto the

121 column (temperature 25 °C) and the porphyrins were detected by their absorbance at 405 nm. A gradient  
122 elution was used rising from 13 % to 30 % acetonitrile in 25 minutes and held there for a further 5  
123 minutes. This was adapted from the protocol used by [18].

124

## 125 **RESULTS**

126 *Complementation Studies:* To test if *P. falciparum* HmbS harbours UroS activity, complementation  
127 studies were performed to see if *P. falciparum hemC* (encoding HmbS) could restore growth to a defined  
128 *hemD* mutant (SASZ31) lacking UroS activity [23]. Two *P. falciparum hemC* constructs were used, both  
129 of which were codon optimised for expression in *E. coli*. One contained the full-length *hemC* gene in a  
130 *pET-3a* vector and the other a truncated *hemC* gene, also in a *pET-3a* vector. The truncation removed a  
131 signal sequence known to hinder gene expression in *E. coli* and has been shown not to be essential for  
132 activity [18].

133 The *hemD* mutant SASZ31 was transformed with these constructs and with control plasmids. The  
134 controls included an empty *pET-3a* as a negative control and plasmids harbouring known *hemD* genes  
135 from *Bacillus megaterium* and *E. coli* as positive controls. As these control genes were in a *pET-14b*  
136 plasmid; an empty *pET-14b* was also used as a further control.

137 The resulting strains were grown on LB-Agar at 37 °C and the size of colonies was noted at 24 and 48  
138 hours. To test for the viability of the colonies after 48 hours they were re-streaked onto a fresh LB-Agar  
139 plate and incubated at 37 °C for 24 hours. The plates were examined for colonies.

140 The control plasmids harbouring known *hemD* genes were able to restore normal growth to the *hemD*  
141 mutant. However, the empty vectors and both the *P. falciparum hemC* constructs were unable to restore  
142 normal growth. This demonstrates that the *P. falciparum hemC* gene cannot compliment an *E. coli hemD*  
143 mutant thus showing that *P. falciparum* HmbS does not have UroS activity. The results are shown in  
144 Table 1.

145

146

147

| Construct                                       | 24 hrs<br>Growth | 48 hrs<br>Growth | Re-streaked<br>24 hrs<br>Growth |
|-------------------------------------------------|------------------|------------------|---------------------------------|
| pET-3a                                          | +                | ++               | -                               |
| pET-14b                                         | +                | ++               | +                               |
| pET-3a <i>hemC</i>                              | +                | ++               | -                               |
| pET-3a<br><i>hemC</i> <sup>truncated</sup>      | +                | ++               | -                               |
| pET-14b <i>hemD</i><br>( <i>E. coli</i> )       | ++++             | ++++             | ++++                            |
| pET-14b <i>hemD</i><br>( <i>B. megaterium</i> ) | ++++             | ++++             | ++++                            |

148

149 **TABLE 1 - Attempts to compliment a *hemD* mutant with *P. falciparum hemC***

150 *hemD* mutant SASZ31 was transformed with various constructs and incubated on LB-Agar plates with  
 151 0.2 % glucose and appropriate antibiotics at 37 °C for 48 hours. The size of any resultant colonies was  
 152 recorded after 24 and 48 hours. To test for viability, the colonies were re-streaked onto a fresh plate and  
 153 grown for a further 24 hours and examined for evidence of growth. The growth is indicated in the table by  
 154 the number of plus signs from + (poor growth) to ++++ (normal growth). A - indicates that no growth was  
 155 observed.

156 Both the full length and the truncated *hemC* (lacking region encoding signal sequence) *P. falciparum*  
 157 *hemC* genes failed to compliment the *E. coli hemD* mutant.

158



159 *Protein Overproduction in E. coli and Identification of the Reaction Product-*

160 A *pET-14b* construct harbouring the *P. falciparum hemC* gene in frame with an N-terminal hexa-His tag  
161 coding sequence was used for protein production in *E. coli*. The *hemC* gene was codon optimised for *E.*  
162 *coli* and lacked the apicoplast localisation sequence. The overproduced protein was mostly insoluble but  
163 a small quantity of soluble protein was successfully purified to homogeneity from the cell lysate using  
164 Ni<sup>2+</sup> affinity chromatography. The purity was assessed by SDS-PAGE (Figure S3).  
165 The purified protein was subjected to a 60 °C heat treatment for 10 minutes to deactivate any  
166 contaminating UroS. The protein was incubated with substrate for 60 minutes at 37 °C and the resulting  
167 product was oxidised with HCl and benzoquinone. This sample was analysed by HPLC to see if the  
168 product was uroporphyrin I (corresponding to hydroxymethylbilane) or uroporphyrin III (corresponding  
169 to uroporphyrinogen III). Identification was by comparison with commercial standards of uroporphyrin I  
170 and III. The product of the reaction product matched the retention time of uroporphyrin I. The results are  
171 shown in Figure 2 and show that *P. falciparum* HmbS does not have UroS activity but can only make  
172 hydroxymethylbilane.

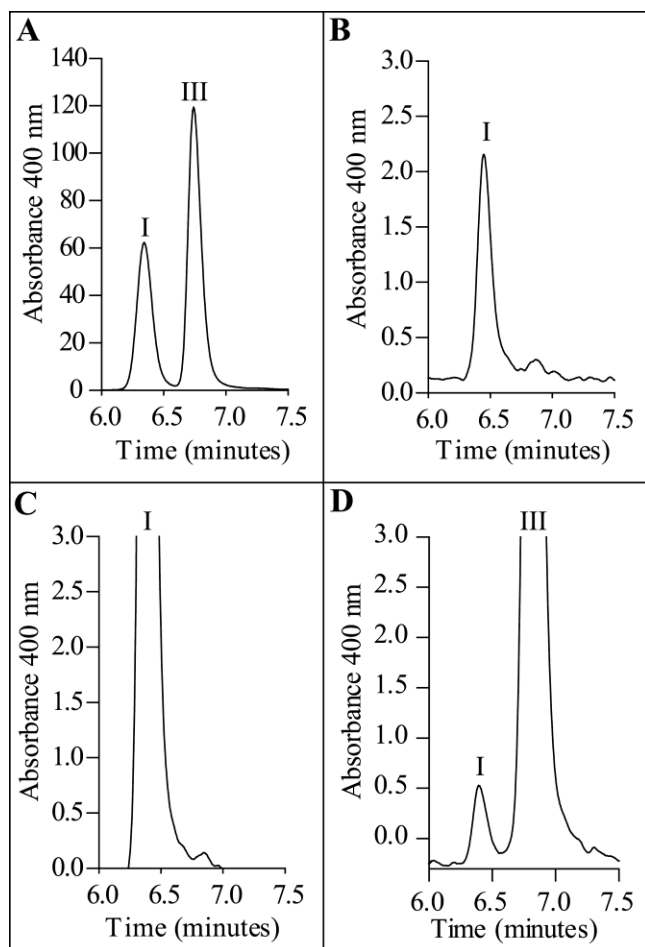

173

## 174 **FIGURE 2- HPLC Analysis of HmbS Reaction Product**

175 HPLC traces showing (A) commercial standards of uroporphyrin I (left) and III (right), (B) the oxidised  
176 reaction product of HmbS alone and (C) spiked with uroporphyrin I and (D) uroporphyrin III

177

## 178 **DISCUSSION**

179 The claim that *P. falciparum* HmbS has UroS activity [18] has been challenged through complementation  
180 studies with a *hemD*<sup>-</sup> mutant and HPLC analysis of the reaction product from recombinant enzyme.

181 SASZ31 is a defined *hemD*<sup>-</sup> mutant that grows very poorly [23]. Complementation with control *hemD*

182 genes from *Bacillus megaterium* and *E. coli* were able to restore normal growth to the mutant but *P.*

183 *falciparum hemC* could not. Because HmbS has an apicoplast localisation sequence that hinders

184 expression but is not required for alleged dual activity [18], a truncated gene lacking this sequence was  
185 also made. This too failed to complement the mutant.  
186 Furthermore, the truncated HmbS was overproduced in *E. coli* with an N-terminal hexa-His tag and  
187 purified. After incubation with substrate for an hour at 37 °C, the sample was oxidised and run on HPLC  
188 along with commercial standards of uroporphyrin I and uroporphyrin III. The HPLC result clearly  
189 identified the enzyme's oxidised product as uroporphyrin I. No uroporphyrin III could be detected. These  
190 results contradict those previously published [18] where HPLC analysis of the reaction product from  
191 native and recombinant HmbS identified the (oxidised) reaction product as uroporphyrin III. This conflict  
192 could be explained by the presence of a contaminating UroS in the earlier study. Although the researchers  
193 used heat treatment to denature any UroS (HmbS is heat stable but UroS is not), it is possible that any  
194 UroS could have refolded and re-activated itself during the 12 hour incubation of heat-treated HmbS with  
195 substrate [25–27]. Also, the assay buffer contained additives known to increase the stability of UroS [27].  
196 Our results clearly demonstrate the previous claim, that *P. falciparum* HmbS contains uroporphyrinogen  
197 III synthase (UroS) activity, is mistaken [18]. It should now be a matter of importance to find the gene  
198 which encodes for the real uroporphyrinogen III synthase.

199

## 200 REFERENCES

1. Heinemann IU, Jahn M, Jahn D. The biochemistry of heme biosynthesis. *Arch Biochem Biophys* 2008. 474:238–251. DOI: 10.1016/J.ABB.2008.02.015.
2. Shemin D, Russell CS.  $\delta$ -aminolevulinic acid, its role in the biosynthesis of porphyrins and purines. *J Am Chem Soc* 1953. 75:4873–4874. DOI: 10.1021/ja01115a546.
3. Jaffe EK. The Remarkable Character of Porphobilinogen Synthase.. *Acc Chem Res* 2016. 49:2509–2517. DOI: 10.1021/acs.accounts.6b00414.
4. Battersby AR, Fookes CJR, Gustafson-Potter KE, Matcham GWJ, McDonald E. Proof by synthesis that unrearranged hydroxymethylbilane is the product from deaminase and the substrate for cosynthetase in the biosynthesis of uro'gen-III. *J Chem Soc Chem Commun* 1979. 0:1155.

- DOI: 10.1039/c39790001155.
5. Bogorad L. The enzymatic synthesis of porphyrins from porphobilinogen. I. Uroporphyrin I.. *J Biol Chem* 1958. 233:501–9.
  6. Battersby AR, Fookes CJR, Gustafson-Potter KE, McDonald E, Matcham GWJ. Biosynthesis of porphyrins and related macrocycles. Part 18. Proof by spectroscopy and synthesis that unrearranged hydroxymethylbilane is the product from deaminase and the substrate for cosynthetase in the biosynthesis of uroporphyrinogen-III. *J Chem Soc Perkin Trans 1* 1982. 0:2427. DOI: 10.1039/p19820002427.
  7. Battersby AR, Fookes CJR, Gustafson-Potter KE, McDonald E, Matcham GWJ. Biosynthesis of porphyrins and related macrocycles. Part 17. Chemical and enzymic transformation of isomeric aminomethylbilanes into uroporphyrinogens: proof that unrearranged bilane is the preferred enzymic substrate and detection of a transient intermediate. *J Chem Soc Perkin Trans 1* 1982. 0:2413. DOI: 10.1039/p19820002413.
  8. Surolia N, Padmanaban G. De novo biosynthesis of heme offers a new chemotherapeutic target in the human malarial parasite. *Biochem Biophys Res Commun* 1992. 187:744–750. DOI: 10.1016/0006-291X(92)91258-R.
  9. Egan TJ. Haemozoin formation. *Mol Biochem Parasitol* 2008. 157:127–136. DOI: 10.1016/J.MOLBIOPARA.2007.11.005.
  10. Ke H, Sigala PA, Miura K, Morrisey JM, Mather MW, Crowley JR, Henderson JP, Goldberg DE, Long CA, Vaidya AB. The heme biosynthesis pathway is essential for *Plasmodium falciparum* development in mosquito stage but not in blood stages.. *J Biol Chem* 2014. 289:34827–37. DOI: 10.1074/jbc.M114.615831.
  11. Goldberg DE, Sigala PA. Plasmodium heme biosynthesis: To be or not to be essential?. *PLoS Pathog* 2017. 13:e1006511. DOI: 10.1371/journal.ppat.1006511.
  12. Varadharajan S, Dhanasekaran S, Bonday ZQ, Rangarajan PN, Padmanaban G. Involvement of delta-aminolaevulinic synthase encoded by the parasite gene in de novo haem synthesis by

- Plasmodium falciparum.. *Biochem J* 2002. 367:321–7. DOI: 10.1042/BJ20020834.
13. Dhanasekaran S, Chandra NR, Chandrasekhar Sagar BK, Rangarajan PN, Padmanaban G. Delta-aminolevulinic acid dehydratase from Plasmodium falciparum: indigenous versus imported.. *J Biol Chem* 2004. 279:6934–42. DOI: 10.1074/jbc.M311409200.
  14. Nagaraj VA, Prasad D, Rangarajan PN, Padmanaban G. Mitochondrial localization of functional ferrochelatase from Plasmodium falciparum. *Mol Biochem Parasitol* 2009. 168:109–112. DOI: 10.1016/J.MOLBIOPARA.2009.05.008.
  15. Nagaraj VA, Arumugam R, Prasad D, Rangarajan PN, Padmanaban G. Protoporphyrinogen IX oxidase from Plasmodium falciparum is anaerobic and is localized to the mitochondrion. *Mol Biochem Parasitol* 2010. 174:44–52. DOI: 10.1016/J.MOLBIOPARA.2010.06.012.
  16. Nagaraj VA, Prasad D, Arumugam R, Rangarajan PN, Padmanaban G. Characterization of coproporphyrinogen III oxidase in Plasmodium falciparum cytosol. *Parasitol Int* 2010. 59:121–127. DOI: 10.1016/J.PARINT.2009.12.001.
  17. Nagaraj VA, Arumugam R, Chandra NR, Prasad D, Rangarajan PN, Padmanaban G. Localisation of Plasmodium falciparum uroporphyrinogen III decarboxylase of the heme-biosynthetic pathway in the apicoplast and characterisation of its catalytic properties. *Int J Parasitol* 2009. 39:559–568. DOI: 10.1016/J.IJPARA.2008.10.011.
  18. Nagaraj VA, Arumugam R, Gopalakrishnan B, Jyothsna YS, Rangarajan PN, Padmanaban G. Unique properties of Plasmodium falciparum porphobilinogen deaminase.. *J Biol Chem* 2008. 283:437–44. DOI: 10.1074/jbc.M706861200.
  19. Shoolingin-Jordan PM. Porphobilinogen deaminase and uroporphyrinogen III synthase: structure, molecular biology, and mechanism.. *J Bioenerg Biomembr* 1995. 27:181–95.
  20. Battersby AR, Fookes CJR, McDonald E, Meegan MJ. Biosynthesis of type-III porphyrins: proof of intact enzymic conversion of the head-to-tail bilane into uro'gen-III by intramolecular rearrangement. *J Chem Soc Chem Commun* 1978. 0:185. DOI: 10.1039/c39780000185.
  21. Mohanty S, Srinivasan N. Identification of "missing" metabolic proteins of Plasmodium

- falciparum: a bioinformatics approach.. *Protein Pept Lett* 2009. 16:961–8.
22. Guégan R, Camadro J-M, Saint Girons I, Picardeau M. Leptospira spp. possess a complete haem biosynthetic pathway and are able to use exogenous haem sources. *Mol Microbiol* 2004. 49:745–754. DOI: 10.1046/j.1365-2958.2003.03589.x.
  23. Chartrand P, Tardif D, Saaasarman A. Uroporphyrin- and Coproporphyrin I-accumulating Mutant of Escherichia coli K12. *J Gen Microbiol* 1979. 110:61–66. DOI: 10.1099/00221287-110-1-61.
  24. Raux E, Leech HK, Beck R, Schubert HL, Santander PJ, Roessner CA, Scott AI, Martens JH, Jahn D, Thermes C, Rambach A, Warren MJ. Identification and functional analysis of enzymes required for precorrin-2 dehydrogenation and metal ion insertion in the biosynthesis of sirohaem and cobalamin in Bacillus megaterium.. *Biochem J* 2003. 370:505–16. DOI: 10.1042/BJ20021443.
  25. Jordan PM, Thomas SD, Warren MJ. Purification, crystallization and properties of porphobilinogen deaminase from a recombinant strain of Escherichia coli K12.. *Biochem J* 1988. 254:427–35.
  26. Alwan AF, Mgbeje BI, Jordan PM. Purification and properties of uroporphyrinogen III synthase (co-synthase) from an overproducing recombinant strain of Escherichia coli K-12.. *Biochem J* 1989. 264:397–402.
  27. Omata Y, Sakamoto H, Higashimoto Y, Hayashi S, Noguchi M. Purification and Characterization of Human Uroporphyrinogen III Synthase Expressed in Escherichia coli. *J Biochem* 2004. 136:211–220. DOI: 10.1093/jb/mvh111.

### **Acknowledgements:**

This work was funded by Pfizer.

### **Conflicts of interest:**

The authors declare that there are no conflicts of interest.
